# Supplementary material for: ROS-producing immature neutrophils in giant cell arteritis are linked to vascular pathologies
Source: PubMed Central journal article supplement (PMC7605529; doi:10.1172/jci.insight.139163), 2020-10-15
Supplement: jciinsight-5-139163-s210.pdf [file jciinsight-5-139163-s210.pdf]

## **Supplementary Materials:**

### **Methods**

#### **Human bone marrow neutrophil isolation**

Human bone marrow was obtained from rib fragments that were removed from lung cancer patients for surgical resection. This study was consented for tissue collection for research purposes at the Hospital of the University of Pennsylvania and The Philadelphia Veterans Affairs Medical Center after obtaining consents that had been approved by their respective Institutional Review Boards (60). Bone marrow neutrophils were isolated from bone marrow cell suspensions using positive selection of CD15<sup>+</sup> or CD66b<sup>+</sup> cells with microbeads according to the manufacturer's instructions (Miltenyi Biotec, Auburn, CA). Bone marrow cell suspension was obtained from the rib fragments that were removed from patients as part of their lung cancer surgery. The single cell suspension was obtained by vigorous pipetting of cells flushed from bone marrow and passing the disaggregated cells through a 70  $\mu$ M nylon cell strainer. To exclude the possible contamination of common progenitors, neutrophils were isolated from a CD34-depleted population of bone marrow cells. Anti-CD15 antibody-conjugated magnetic microbeads (Miltenyi Biotec) were used for positive selection.

#### **Heatmap generation of selected genes from published transcriptomic dataset**

Selected genes from the Grassi. *et al* dataset (37) from three healthy human bone marrow donors and three healthy human venous blood donors were used to generate the heatmap with pheatmap R package (Supplementary Figure 6A).

Selected genes from enriched CD10<sup>+</sup> and CD10<sup>-</sup> LDN transcriptomes were analysed as the following. FastQ files were downloaded from the GEO database using accession no.

GSE139360. Adapter sequences were removed using trimgalore/0.4.4 (<https://github.com/FelixKrueger/TrimGalore>). Reads were mapped to the human genome GRCh38 version 91 using hisat2/2.1.0 (61) and quantified with featureCounts/1.6.3 from the Subread package (62). Gene expression values (Variance stabilised (VST) counts) were calculated using the vst function of DESeq2 (59). Heatmaps were generated with the pheatmap R package. (Supplementary Figure 6B&C)

Supplementary references:

60. Singhal S, Bhojnagarwala PS, O'Brien S, Moon EK, Garfall AL, Rao AS, et al. Origin and Role of a Subset of Tumor-Associated Neutrophils with Antigen-Presenting Cell Features in Early-Stage Human Lung Cancer. *Cancer Cell*. 2016;30(1):120-35.
61. Kim D, Langmead B, and Salzberg SL. HISAT: a fast spliced aligner with low memory requirements. *Nat Methods*. 2015;12(4):357-60.
62. Liao Y, Smyth GK, and Shi W. featureCounts: an efficient general purpose program for assigning sequence reads to genomic features. *Bioinformatics*. 2014;30(7):923-30.

# Supplementary Figures

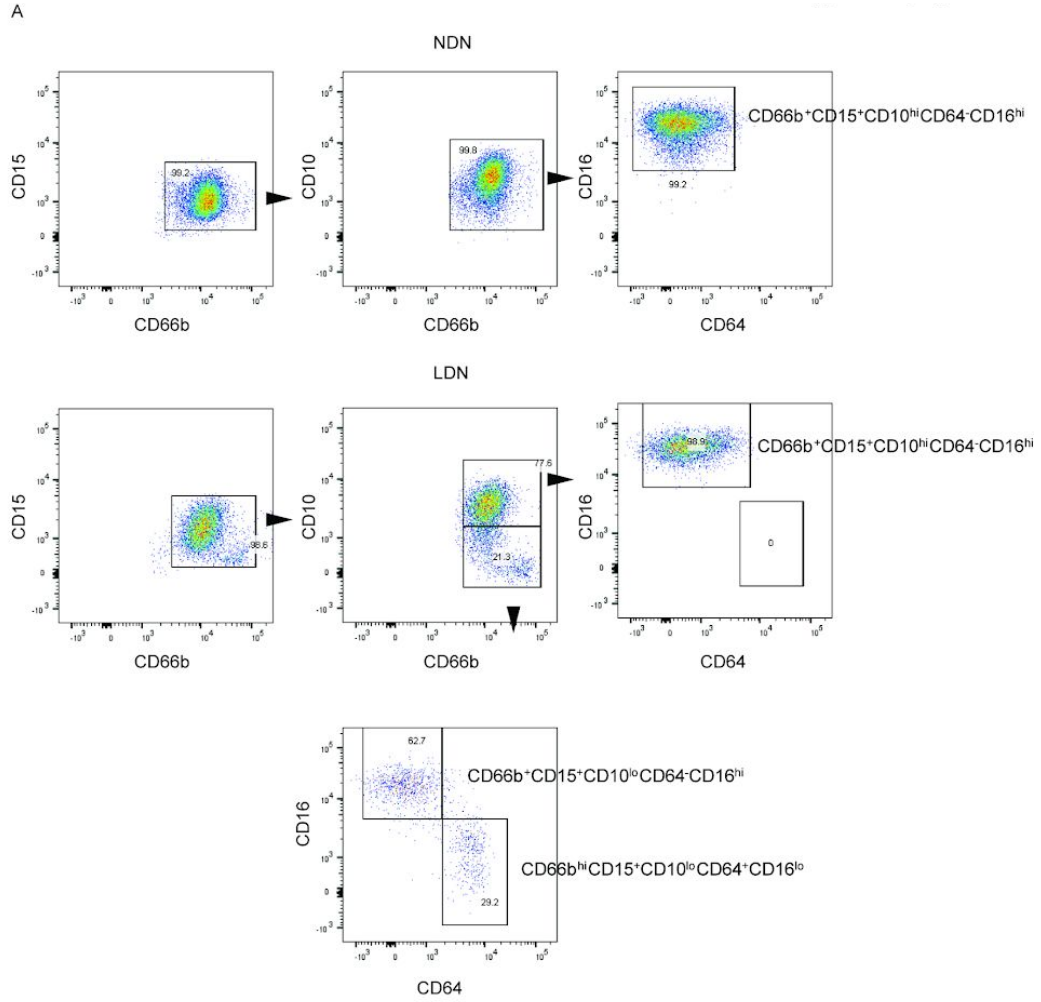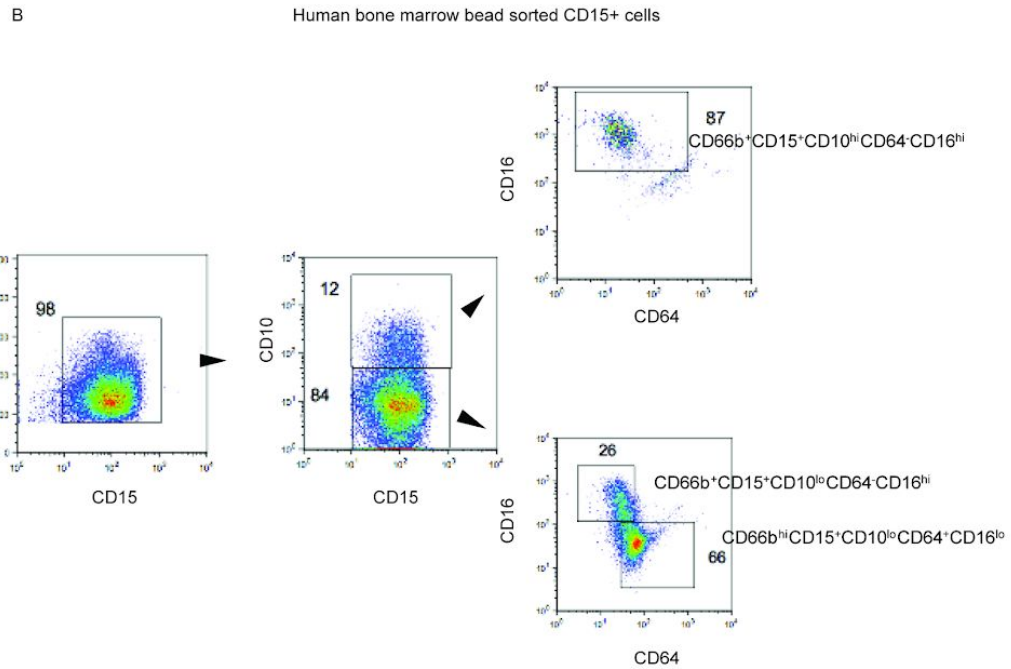

**Figure 1 FACS gating strategy to isolate the four neutrophil populations** A) in blood. B) Similar gating strategy was applied on bead sorted total neutrophils from human bone marrow to validate the use of CD64, CD10 and CD16 to define distinct neutrophil subsets.

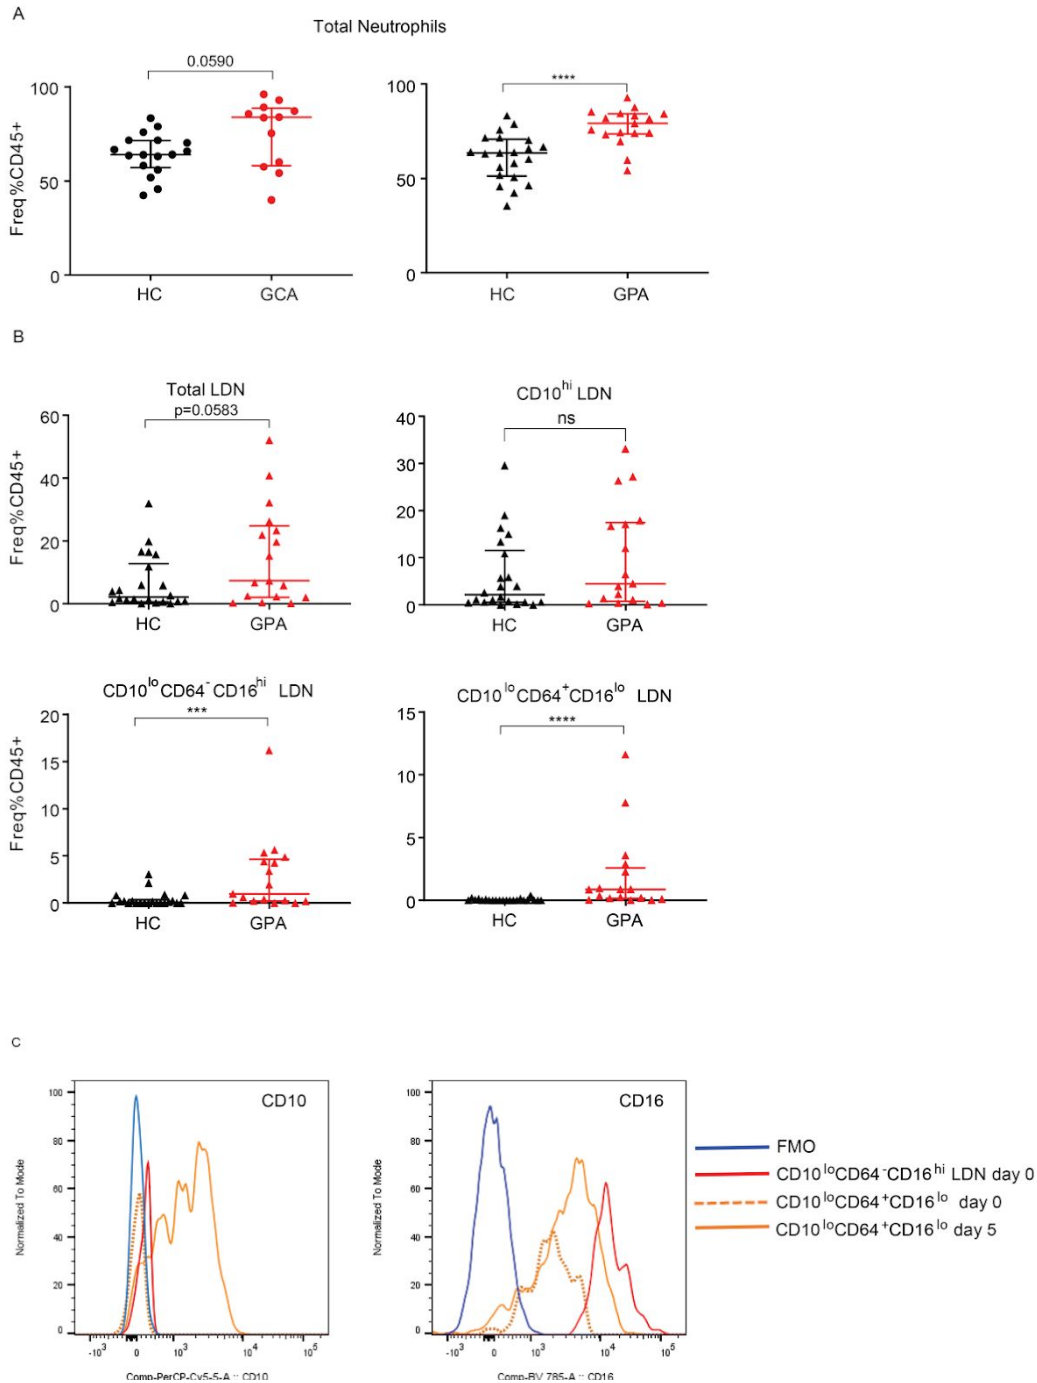

**Figure 2 Total neutrophils in GCA and GPA and neutrophil subsets frequencies in GPA.** A) Frequency of total neutrophils out of CD45+ immune cells in the blood between vasculitis patients and HCs. GCA n=13, HC=15 (for GCA); GPA n=17, HC=22 (for GPA). Data is presented with median± interquartile range. B) Neutrophil subset frequency comparison between GPA and HC. (GPA n=17 and HC n=22). Unpaired nonparametric Mann-Whitney test was used for statistical analysis. Data is presented with median± interquartile range. \*p ≤ 0.05, \*\*p ≤ 0.01, \*\*\*p ≤ 0.001

$\leq 0.001$ , \*\*\*\* $p \leq 0.0001$ . C)  $CD10^{lo}CD64^{+}CD16^{lo}$  expressed significant levels of CD10 and CD16 after 5 days *in vivo* culture in the presence of G-CSF. Solid blue line: The Fluorescence Minus One Control (FMO) for CD10 and CD16; red solid line:  $CD10^{lo}CD64^{+}CD16^{hi}$  LDN at D0 in culture; orange dashed line:  $CD10^{lo}CD64^{+}CD16^{lo}$  LDN at D0 in culture and orange solid line:  $CD10^{lo}CD64^{+}CD16^{lo}$  LDN at D5 in culture. Expression of CD10 and CD16 is presented as FACS histograms. One representative from 3 independent experiments on FACS sorted neutrophil populations is shown.

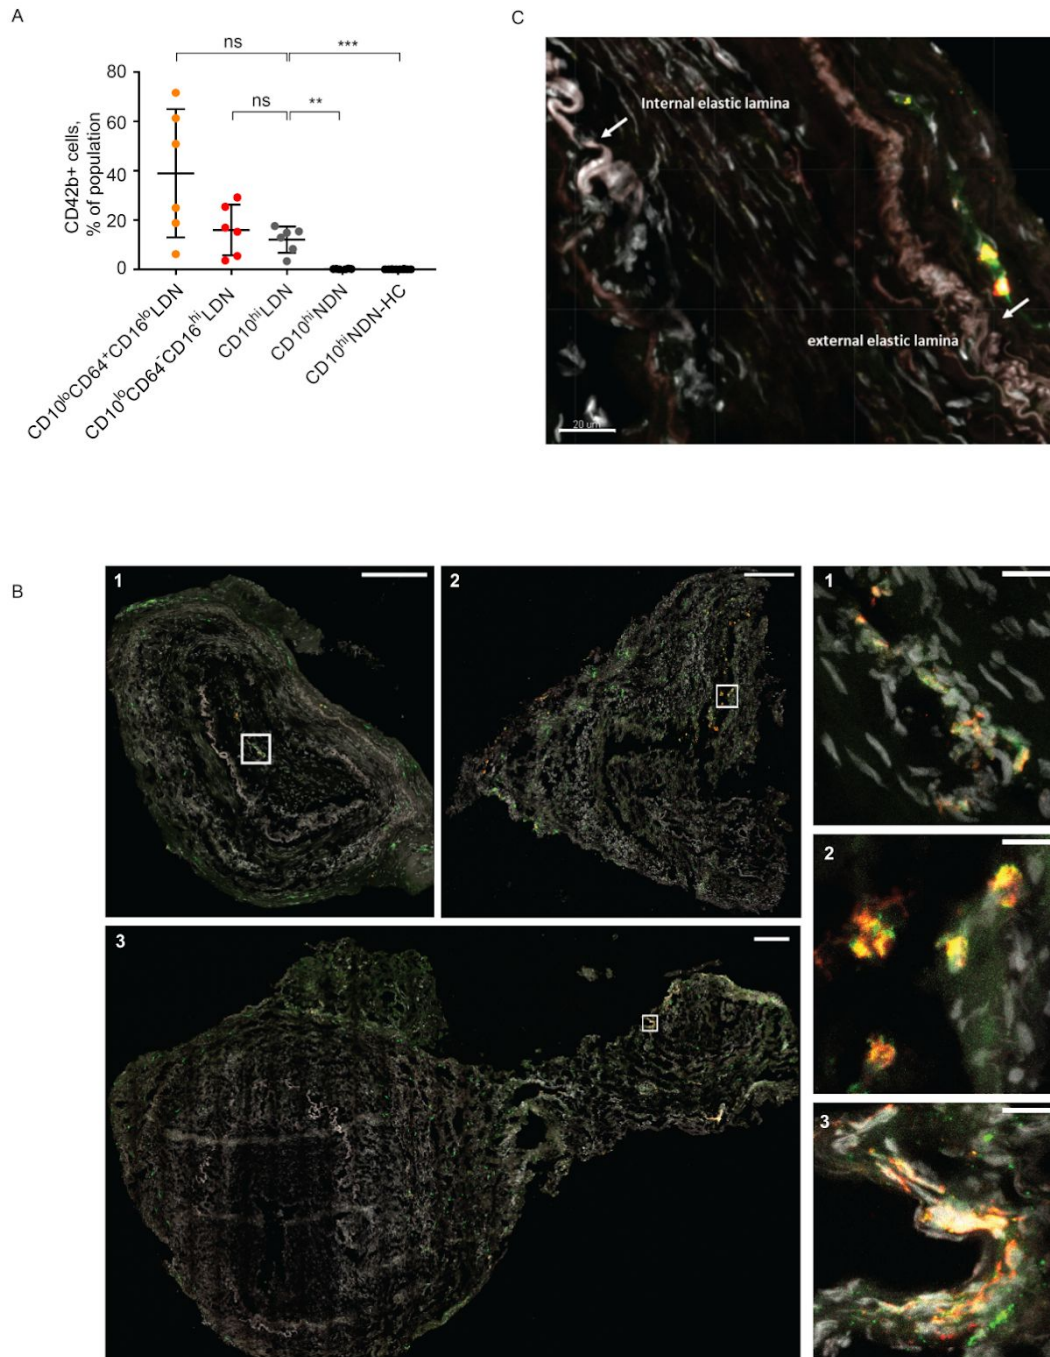

**Figure 3** LDNs associate with platelets and confocal images of immature neutrophils distribution used for quantification. A) LDNs but not NDNs interacted with platelets. Data is presented with mean±SD. Nonparametric one way ANOVA Kruskal-Wallis test was used for statistical analysis. (GCA n=6, HC n=10). \*P ≤0.05, \*\*p ≤ 0.01, \*\*\*p ≤ 0.001, \*\*\*\*p ≤ 0.0001. B) Confocal images of temporal artery sections from 3 different GCA patients stained for neutrophil elastase (NE, red), CD15 (green) and Hoechst (grey) for DNA show the presence of

neutrophils within the lumen and tissue. These sections were used for quantification in Figure 3G. Zoomed in regions with neutrophils show mostly immature cells with unsegmented nucleus. Scale bar 20  $\mu\text{m}$ . C) Immature neutrophils were found mainly in the lumen close to the internal elastica lamina and adventitia close to external lamina elastica but largely absent in the media. Breaks were observed in elastic lamina as indicated by the arrows.



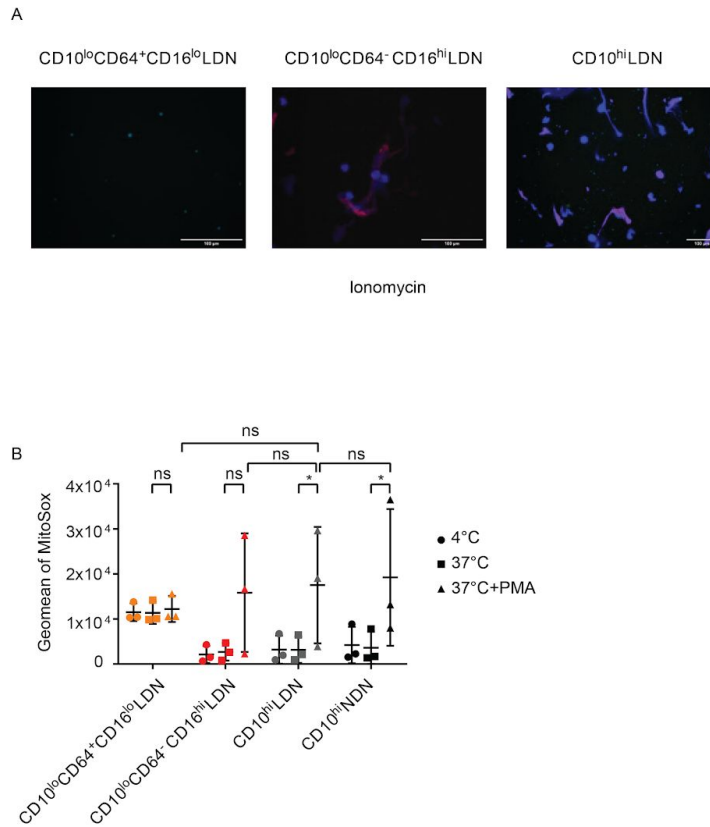

**Figure 4 Confocal images of NET formation of LDN subsets and their mitochondrial ROS production.** A) Merged images show NET formation of three FACS purified LDN populations. Red: Citrullinated Histone 3 (Cit-H3), Green: Elastase (NE) and Blue: DAPI. CD10<sup>lo</sup>CD64<sup>+</sup>CD16<sup>lo</sup> LDNs could not perform NETosis while the other neutrophil subsets were capable of NETosis. Representatives from at least three independent experiments are shown. B) Mitochondria-derived ROS was measured by MitoSOX<sup>TM</sup> Red. Immature LDNs were capable of generating mitochondrial ROS comparable to mature LDNs and NDNs. Data is presented with mean±SD. Three independent experiments were performed on FACS purified neutrophil populations from 3 GCA donors.

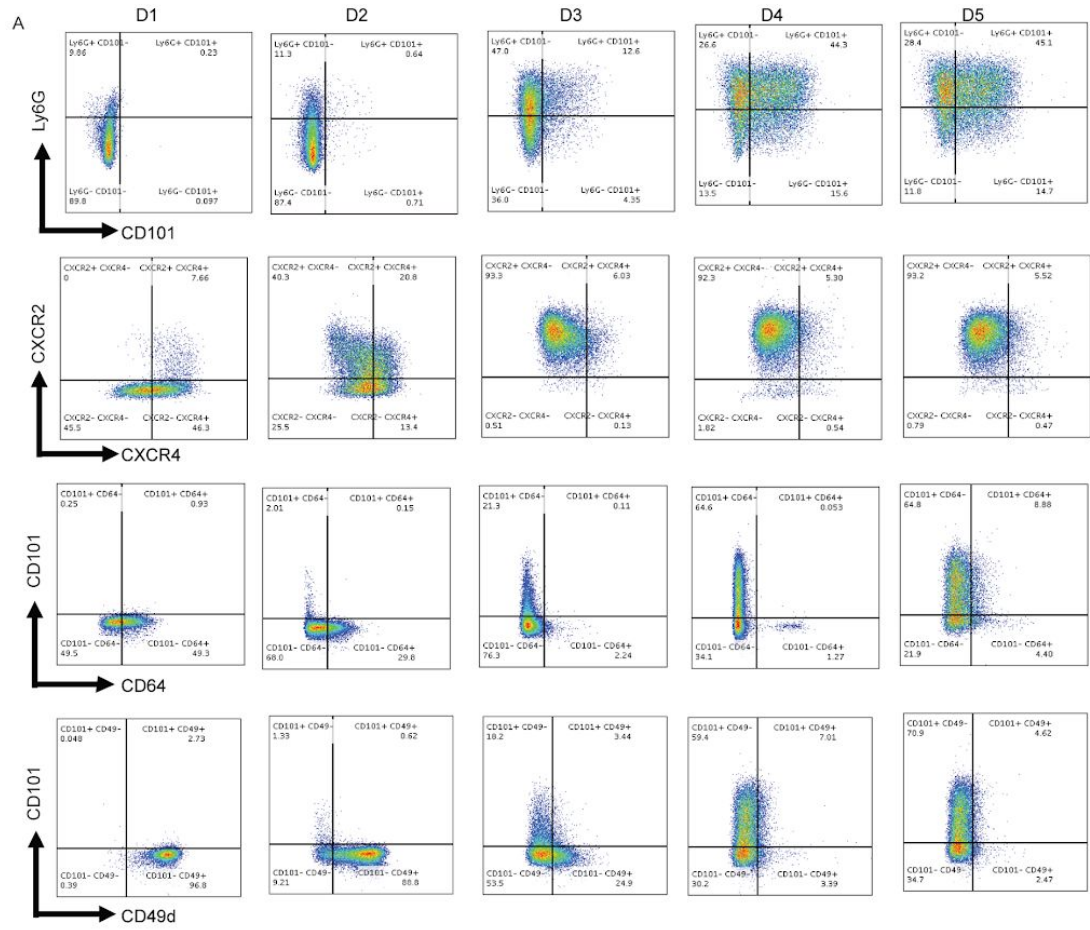

**B**  
PMA (10  $\mu$ M) + ionomycin (5  $\mu$ M)

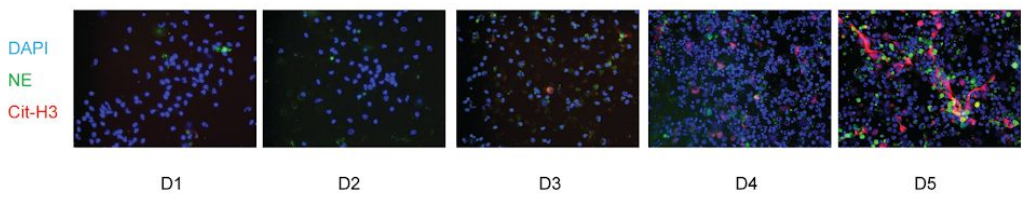

**C** DPI inhibition of extracellular ROS

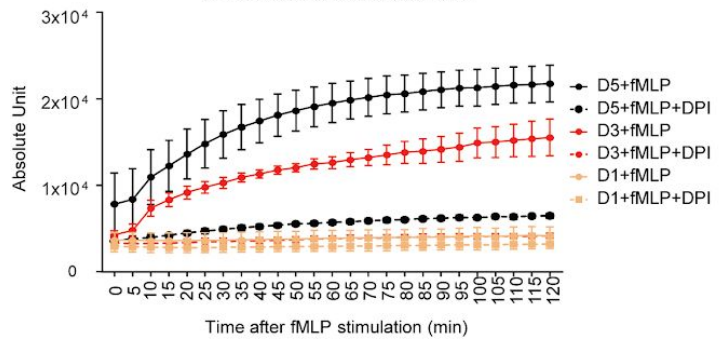

**D** DPI inhibition of endothelial permeability

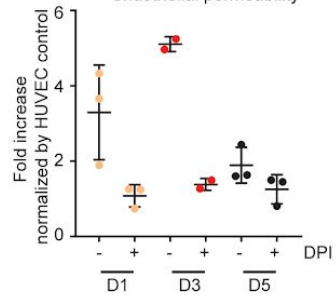

**Figure 5 Validation of *ex vivo* Hoxb8 neutrophils as a useful system to study human neutrophils.** A) Key surface markers in neutrophil maturation and development were conserved in the differentiation of ER-Hoxb8 neutrophils post G-CSF treatment from D1-D5. Scatter plots of one representative from at least three independent experiments were shown. B) Merged images show NET formation of Hoxb8 neutrophils from D1-D5 post differentiation. Red: Citrullinated Histone 3 (Cit-H3), Green: elastase (NE) and Blue: DAPI. Mature D5 Hoxb8 neutrophils were able to induce NET potently upon stimulation. Representatives from at least three independent experiments were shown. C) Addition of 25  $\mu$ M DPI inhibited the generation of extracellular ROS in ER-Hoxb8 neutrophils. D) Extracellular ROS production at 120 minutes in the presence of 25  $\mu$ M DPI was compared across ER-Hoxb8 neutrophils of different days of maturation. Data is presented with mean $\pm$ SD

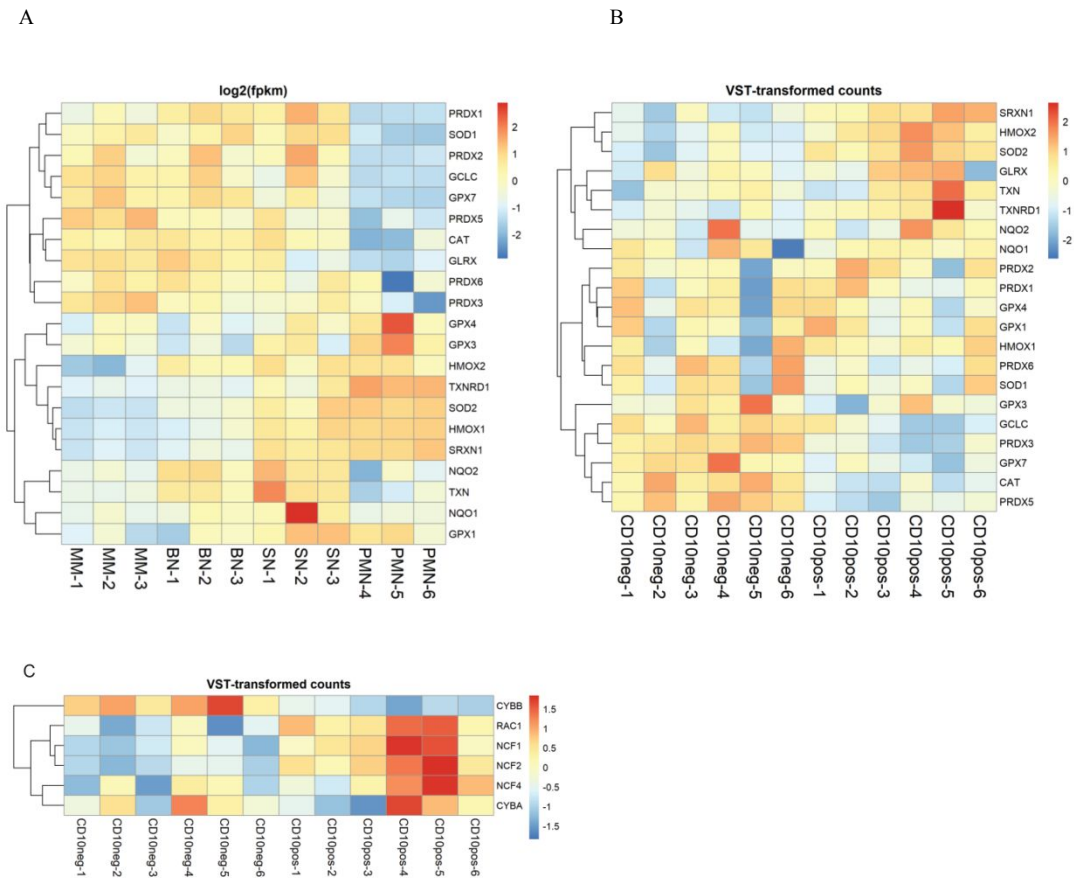

**Figure 6 Expression comparison of selected anti-oxidant and NOX2 complex genes with published human neutrophil dataset.** A) RNA expression in log<sub>2</sub>(FPKM) of selected genes from the Grassi *et al.* dataset, centred and scaled by genes, representing three healthy human bone marrow donors (donor 1-3) and three healthy human venous blood donors (donor 4-6) (37). MM = metamyelocytes, BN = band neutrophil, SN = segmented neutrophil, PMN = blood neutrophils. B) RNA expression in VST-transformed count values of selected anti-oxidant genes and C) NOX2 complex from the Mistry *et al.* dataset, centered and scaled by genes, representing CD10neg and CD10pos low-density granulocytes from six SLE patients (38).

## Supplementary tables

**Table 1 CyToF antibody panel**

| Metal | Antibody | Clone      | Chosen tag | Company        | Cat. Number |
|-------|----------|------------|------------|----------------|-------------|
| 89    | CD45     | HI30       | Y          | Fluidigm       | 3089003B    |
| 141   | CD42b    | HID1       | Pr         | BioLegend      | 303902      |
| 141   | CD235ab  | DREG-56    | Pr         | Fluidigm       | 3141001B    |
| 142   | CD19     | HIB19      | Nd         | Fluidigm       | 3142001B    |
| 143   | HLADR    | L243       | Nd         | Fluidigm       | 3143013B    |
| 144   | CD35     | E11        | Nd         | BioLegend      | 333402      |
| 145   | CD31     | WM59       | Nd         | Fluidigm       | 3145004B    |
| 146   | CD64     | 10.1       | Nd         | Fluidigm       | 3146006B    |
| 147   | CD54     | HCD54      | Sm         | BioLegend      | 322702      |
| 148   | CD16     | 3G8        | Nd         | Fluidigm       | 3148004B    |
| 149   | CD66a    | CD66a-B1.1 | Sm         | Fluidigm       | 3149008B    |
| 151   | CD123    | 6H6        | Eu         | Fluidigm       | 3151001B    |
| 152   | CD66b    | 80H3       | Sm         | Fluidigm       | 3152011B    |
| 153   | CD62L    | DREG-56    | Eu         | Fluidigm       | 3153004B    |
| 154   | CD163    | GH1/61     | Sm         | Fluidigm       | 3154007B    |
| 156   | CD86     | IT2.2      | Gd         | Fluidigm       | 3156008B    |
| 158   | CD10     | HI10a      | Gd         | Fluidigm       | 312202      |
| 159   | CD11c    | Bu15       | Tb         | Fluidigm       | 3159001B    |
| 160   | CD14     | M5E2       | Gd         | Fluidigm       | 3160006B    |
| 161   | CD80     | 2D10.4     | Dy         | Fluidigm       | 3161023B    |
| 162   | CD88     | S5/1       | Dy         | BioLegend      | 344302      |
| 163   | CD181    | 5A12       | Dy         | BD Biosciences | 555937      |
| 164   | Siglec-8 | 7C9        | Dy         | BioLegend      | 347102      |
| 165   | CD101    | BB27       | Ho         | Fluidigm       | 3165029B    |

|     |       |                |    |             |            |
|-----|-------|----------------|----|-------------|------------|
| 166 | CD182 | eBio5E8-C7-F10 | Ho | eBioscience | 14-1829-85 |
| 168 | CD206 | 15.2           | Er | Fluidigm    | 3168008B   |
| 169 | CD33  | WM53           | Tm | Fluidigm    | 3169010B   |
| 170 | CD3   | UCHT1          | Er | Fluidigm    | 3170007B   |
| 172 | CD15  | W6D3           | Yb | Fluidigm    | 3172021B   |
| 173 | CD184 | 12G5           | Yb | Fluidigm    | 3173001B   |
| 174 | CD49d | 9F10           | Yb | Fluidigm    | 3174018B   |
| 175 | CD274 | 29E.2A3        | Lu | Fluidigm    | 3175017B   |
| 176 | CD56  | NCAM16.2       | Yb | Fluidigm    | 3176008B   |
| 209 | CD11b | ICRF44         | Bi | Fluidigm    | 3209003B   |

**Table 2A Clinical features of diagnosis (n=8) and flare (n=6)**

|                        | GCA      | HC       |
|------------------------|----------|----------|
| <b>Demographics</b>    |          |          |
| Age (ys Mean± S.E.M)   | 70.9±2.6 | 62.9±1.9 |
| Gender                 | 8M 6F    | 3M 13F   |
| <b>Smoking history</b> |          |          |
| Ex-smoker              | 33%      | -        |
| current smoker         | 1.6%     | -        |
| never smoked           | 50%      | -        |
| <b>Cardiovascular</b>  |          |          |
| hypertension           | 50%      | -        |
| <b>Symptoms</b>        |          |          |
| scalp tenderness       | 94%      | -        |

|                                  |     |   |
|----------------------------------|-----|---|
| headaches                        | 94% | - |
| morning stiffness (up to 60mins) | 26% | - |

Ultrasound of temporal arteries

|                     |          |   |
|---------------------|----------|---|
| Halo on both sides  | 38%      | - |
| Halo on single side | 55%      | - |
| BVAS (Mean± S.E.M)  | 6.74±0.9 | - |
| VDI (Mean± S.E.M)   | 2.9±0.78 | - |

Haematology and biochemistry (Mean± S.E.M)

|                                 |            |   |
|---------------------------------|------------|---|
| Haemoglobin (g/L)               | 131±4.9    | - |
| Neutrophil (x10 <sup>9</sup> L) | 10±2.75    | - |
| Platelets (x10 <sup>9</sup> L)  | 346.6±39.7 | - |
| CRP (g/L)                       | 29.1±17.7  | - |

**Table 2B Clinical features of diagnosis (n=12) and flare (n=5)**

|                      | GPA      | HC     |
|----------------------|----------|--------|
| Demographics         |          |        |
| Age (ys Mean± S.E.M) | 57.3±3.9 | 54±3.4 |
| Gender               | 7M 10F   | 6M 16F |
| Smoking history      |          |        |
| Ex-smoker            | 33%      | -      |
| current smoker       | 6%       | -      |
| never smoked         | 60%      | -      |

Cardiovascular

|                                            |           |   |
|--------------------------------------------|-----------|---|
| hypertension                               | 26%       | - |
| Symptoms                                   |           |   |
| Nasal crusting                             | 60%       | - |
| Epistaxis                                  | 53%       | - |
| Paranasal sinus involvement                | 53%       | - |
| history of sinusitis                       | 40%       | - |
| cANCA+ve PR3+ve                            | 60%       | - |
| pANCA+ve MPO+ve                            | 6%        | - |
| pANCA+ve MPO-ve                            | 6%        | - |
| BVAS (Mean± S.E.M)                         | 13.4±1.3  | - |
| VDI (Mean± S.E.M)                          | 0.76±0.36 | - |
| Haematology and biochemistry (Mean± S.E.M) |           |   |
| Haemoglobin (g/L)                          | 122±4.9   | - |
| Neutrophil (x10 <sup>9</sup> L)            | 8.27±0.75 | - |
| Platelets (x10 <sup>9</sup> L)             | 342.8±29  | - |
| CRP (g/L)                                  | 53.7±14.9 | - |
| Creatinine (g/L)                           | 93.1±16.8 | - |

**Table 3A Two way multivariate analysis of variance (MANOVA) on age and gender on neutrophil subset frequency difference**



### Multivariate Tests<sup>a</sup>

| Effect    |                | Value | F                  | Hypothesis df | Error df | Sig.  | Partial Eta Squared |
|-----------|----------------|-------|--------------------|---------------|----------|-------|---------------------|
| Intercept | Pillai's Trace | 0.122 | .870 <sup>b</sup>  | 4.000         | 25.000   | 0.496 | 0.122               |
| Condition | Pillai's Trace | 0.322 | 2.969 <sup>b</sup> | 4.000         | 25.000   | 0.039 | 0.322               |
| Gender    | Pillai's Trace | 0.139 | 1.009 <sup>b</sup> | 4.000         | 25.000   | 0.422 | 0.139               |
| Age       | Pillai's Trace | 0.091 | .628 <sup>b</sup>  | 4.000         | 25.000   | 0.647 | 0.091               |

a. Design: Intercept + Condition + Gender + Age

b. Exact statistic

**Table 3B Corrected two way MANOVA analysis of each neutrophil subset on age and gender**

| Corrected Tests of Between-Subjects Effects |                                                        |                         |    |             |        |       |                     |
|---------------------------------------------|--------------------------------------------------------|-------------------------|----|-------------|--------|-------|---------------------|
| Source                                      | Dependent Variable                                     | Type III Sum of Squares | df | Mean Square | F      | Sig.  | Partial Eta Squared |
| Corrected Model                             | CD10 <sup>hi</sup>                                     | 1820.965 <sup>a</sup>   | 3  | 606.988     | 3.386  | 0.032 | 0.266               |
|                                             | TotalLDN                                               | 6871.363 <sup>c</sup>   | 3  | 2290.454    | 4.473  | 0.011 | 0.324               |
|                                             | CD10 <sup>lo</sup> CD64 <sup>-</sup>                   | 532.976 <sup>d</sup>    | 3  | 177.659     | 2.098  | 0.123 | 0.183               |
|                                             | CD10 <sup>lo</sup> CD64 <sup>+</sup> CD16 <sup>l</sup> | 66.797 <sup>e</sup>     | 3  | 22.266      | 2.949  | 0.049 | 0.240               |
| Intercept                                   | CD10 <sup>hi</sup>                                     | 400.764                 | 1  | 400.764     | 2.235  | 0.146 | 0.074               |
|                                             | TotalLDN                                               | 155.959                 | 1  | 155.959     | 0.305  | 0.585 | 0.011               |
|                                             | CD10 <sup>lo</sup> CD64 <sup>-</sup>                   | 22.120                  | 1  | 22.120      | 0.261  | 0.613 | 0.009               |
|                                             | CD10 <sup>lo</sup> CD64 <sup>+</sup> CD16 <sup>l</sup> | 0.250                   | 1  | 0.250       | 0.033  | 0.857 | 0.001               |
| Condition                                   | CD10 <sup>hi</sup>                                     | 1805.340                | 1  | 1805.340    | 10.069 | 0.004 | 0.265               |
|                                             | TotalLDN                                               | 5994.366                | 1  | 5994.366    | 11.705 | 0.002 | 0.295               |
|                                             | CD10 <sup>lo</sup> CD64 <sup>-</sup>                   | 320.048                 | 1  | 320.048     | 3.779  | 0.062 | 0.119               |
|                                             | CD10 <sup>lo</sup> CD64 <sup>+</sup> CD16 <sup>l</sup> | 35.702                  | 1  | 35.702      | 4.729  | 0.038 | 0.144               |
| Gender                                      | CD10 <sup>hi</sup>                                     | 158.847                 | 1  | 158.847     | 0.886  | 0.355 | 0.031               |
|                                             | TotalLDN                                               | 693.618                 | 1  | 693.618     | 1.354  | 0.254 | 0.046               |
|                                             | CD10 <sup>lo</sup> CD64 <sup>-</sup>                   | 35.431                  | 1  | 35.431      | 0.418  | 0.523 | 0.015               |
|                                             | CD10 <sup>lo</sup> CD64 <sup>+</sup> CD16 <sup>l</sup> | 4.172                   | 1  | 4.172       | 0.553  | 0.463 | 0.019               |
| Age                                         | CD10 <sup>hi</sup>                                     | 234.131                 | 1  | 234.131     | 1.306  | 0.263 | 0.045               |
|                                             | TotalLDN                                               | 39.882                  | 1  | 39.882      | 0.078  | 0.782 | 0.003               |
|                                             | CD10 <sup>lo</sup> CD64 <sup>-</sup>                   | 30.687                  | 1  | 30.687      | 0.362  | 0.552 | 0.013               |
|                                             | CD10 <sup>lo</sup> CD64 <sup>+</sup> CD16 <sup>l</sup> | 0.186                   | 1  | 0.186       | 0.025  | 0.876 | 0.001               |
| Error                                       | CD10 <sup>hi</sup>                                     | 5020.071                | 28 | 179.288     |        |       |                     |
|                                             | TotalLDN                                               | 14338.868               | 28 | 512.102     |        |       |                     |
|                                             | CD10 <sup>lo</sup> CD64 <sup>-</sup>                   | 2371.587                | 28 | 84.700      |        |       |                     |
|                                             | CD10 <sup>lo</sup> CD64 <sup>+</sup> CD16 <sup>l</sup> | 211.399                 | 28 | 7.550       |        |       |                     |
| Total                                       | CD10 <sup>hi</sup>                                     | 11777.638               | 32 |             |        |       |                     |
|                                             | Total LDN                                              | 34063.486               | 32 |             |        |       |                     |
|                                             | CD10 <sup>lo</sup> CD64 <sup>-</sup>                   | 3471.397                | 32 |             |        |       |                     |
|                                             | CD10 <sup>lo</sup> CD64 <sup>+</sup> CD16 <sup>l</sup> | 345.227                 | 32 |             |        |       |                     |
| Corrected Total                             | CD10 <sup>hi</sup>                                     | 6841.036                | 31 |             |        |       |                     |
|                                             | Total LDN                                              | 21210.231               | 31 |             |        |       |                     |
|                                             | CD10 <sup>lo</sup> CD64 <sup>-</sup>                   | 2904.562                | 31 |             |        |       |                     |
|                                             | CD10 <sup>lo</sup> CD64 <sup>+</sup> CD16 <sup>l</sup> | 278.196                 | 31 |             |        |       |                     |

a. R Squared = .266 (Adjusted R Squared = .188)

b. R Squared = .269 (Adjusted R Squared = .191)

c. R Squared = .324 (Adjusted R Squared = .252)

d. R Squared = .183 (Adjusted R Squared = .096)

e. R Squared = .240 (Adjusted R Squared = .159)

**Table 4 FACS antibody panel**

| Conjugation     | Antibody | Clone   | Company          | Cat. Number    |
|-----------------|----------|---------|------------------|----------------|
| Alex-Flour® 700 | CD3      | OKT3    | Biolegend        | 317339         |
| APC/Cy7         | CD3      | OCHT1   | Biolegend        | 300425         |
| PerCP Cy5.5     | CD10     | HI10a   | Biolegend        | 312216         |
| BV510           | CD11b    | ICRF44  | Biolegend        | 301334         |
| FITC            | CD14     | 10.1    | Biolegend        | 305005         |
| BV650           | CD14     | M5F2    | Biolegend        | 301835         |
| APC/Cy7         | CD14     | M5F2    | Biolegend        | 301819         |
| FITC            | CD15     | W6D3    | BD Pharmingen    | 562370         |
| PE/Dazzle 594   | CD15     | W6D3    | Biolegend        | 323038         |
| BV785           | CD16     | 3G8     | Biolegend        | 302045         |
| PeCy7           | CD45     | IV N816 | BD Pharmingen    | 557748         |
| BV650           | CD45     | HI30    | Biolegend        | 304001         |
| PE Dazzle       | CD49d    | 9F10    | Biolegend        | 304326         |
| BV605           | CD62L    | DREG-56 | Biolegend        | 304834         |
| PE              | CD64     | 10.1    | Biolegend        | 305007         |
| BV421           | CD66b    | G10F5   | BD Biosciences   | 562940         |
| PE/Cy7          | CD101    | BB27    | Biolegend        | 331013         |
| APC             | CD114    | LMM741  | Biolegend        | 346107         |
| FITC            | CD116    | 4H1     | Biolegend        | 305906         |
| PE              | CXCR4    | 12G5    | Biolegend        | 306505         |
| APC             | Siglec8  | 7C9     | Biolegend        | 347105         |
| PE              | Siglec8  | 7C9     | Biolegend        | 347111         |
| APC             | Ki67     | 20Raj1  | ThermoScientific | 17-5699-4<br>2 |
| BV 711          | Ly6G     | 1A8     | Biolegend        | 127643         |

|                  |       |           |                   |                |
|------------------|-------|-----------|-------------------|----------------|
| PE-Cyanine7      | CD101 | Moushi101 | Life Technologies | 25-1011-8<br>2 |
| PE               | CXCR2 | SA044G4   | Biolegend         | 149303         |
| BV 421           | CXCR4 | L276F12   | Biolegend         | 146511         |
| Alexa Fluor® 647 | CD64  | X54-5/7.1 | Biolegend         | 139321         |
| APC              | CD49d | R1-2      | Biolegend         | 103621         |
| BV 785           | Ly-6C | HK1.4     | BioLegend         | 128041         |
